# Supplementary material for: Revisiting Cerebrospinal Fluid Flow Direction and Rate in Physiologically Based Pharmacokinetic Model
Source: MDPI journal article supplement (doi:10.3390/pharmaceutics14091764), 2022-08-24
Supplement: s1 [file s1]

---

## Supplementary material

*Article*

# Revisiting Cerebrospinal Fluid Flow Direction and Rate in Physiologically Based Pharmacokinetic Model

Makoto Hirasawa and Elizabeth C. M. de Lange \*

Division of Systems Pharmacology and Pharmacy, Leiden Academic Center for Drug Research, Leiden University, 2333 CC Leiden, The Netherlands.; m.hirasawa@lacdr.leidenuniv.nl

\* Correspondence: ecmde Lange@lacdr.leidenuniv.nl; Tel.: +31-71-527-6330

## Supplementary Equations. AF equations to calculate the influx and efflux asymmetry factors at the BBB and BCSFB.

$$AF_{BBB,ef} = - \frac{((Q_{CBF} + AF_{BBB,in} * CL_{tBBB} * PHF_{MV} + CLp_{BBB}) * Q_{ECF} + CLp_{BBB} * Q_{CBF}) * Kp_{uu,ECF} - (AF_{BBB,in} * CL_{tBBB} * PHF_{MV} + CLp_{BBB}) * Q_{CBF}}{CL_{tBBB} * PHF_{ECF} * Q_{CBF} * Kp_{uu,ECF}}$$

$$AF_{BBB,in} = - \frac{((Q_{CBF} + CLp_{BBB}) * Q_{ECF} + (AF_{BBB,ef} * CL_{tBBB} * PHF_{ECF} + CLp_{BBB}) * Q_{CBF}) * Kp_{uu,ECF} - CLp_{BBB} * Q_{CBF}}{CL_{tBBB} * PHF_{MV} * Q_{ECF} * Kp_{uu,ECF} - CL_{tBBB} * PHF_{MV} * Q_{CBF}}$$

$$AF_{LV,ef} = \frac{Q_{TFV} * Kp_{uu,CM} * venQ_{CSF,D} * ((sasQ_{CSF} + cisQ_{CSF,U}) * venQ_{CSF,U} + cisQ_{CSF,D} * sasQ_{CSF}) - (sasQ_{CSF} + cisQ_{CSF,U}) * Q_{TFV} * Kp_{uu,LV} * venQ_{CSF,U} + ((Q_{TFV} * Q_{CSF} * Kp_{uu,ECF} - CLp_{BCSFB} * Q_{TFV} * Kp_{uu,LV} + (AF_{LV,ef} * CL_{tBCSFB} * PHF_{MV} + CLp_{BCSFB}) * (Q_{ECF} * Kp_{uu,ECF} - cisQ_{CSF,D} * Kp_{uu,CM} + Q_{TFV})) * sasQ_{CSF} - CLp_{BCSFB} * Q_{TFV} * cisQ_{CSF,U} * Kp_{uu,LV} + Q_{TFV} * Q_{CSF} * cisQ_{CSF,U} * Kp_{uu,ECF} + (AF_{LV,in} * CL_{tBCSFB} * PHF_{MV} + CLp_{BCSFB}) * (Q_{ECF} * cisQ_{CSF,U} * Kp_{uu,ECF} + Q_{TFV} * cisQ_{CSF,D})) * venQ_{CSF,D}}{venQ_{CSF,D} * CL_{tBCSFB} * PHF_{MV} * Q_{TFV} * Kp_{uu,LV} * (sasQ_{CSF} + cisQ_{CSF,U})}$$

$$AF_{LV,in} = - \frac{(Q_{TFV} * Kp_{uu,CM} * venQ_{CSF,D} * ((sasQ_{CSF} + cisQ_{CSF,U}) * venQ_{CSF,U} + cisQ_{CSF,D} * sasQ_{CSF}) - (sasQ_{CSF} + cisQ_{CSF,U}) * Q_{TFV} * Kp_{uu,LV} * venQ_{CSF,U} + ((Q_{TFV} + CLp_{BCSFB}) * Q_{ECF} * Kp_{uu,ECF} - CLp_{BCSFB} * cisQ_{CSF,D} * Kp_{uu,CM} + CLp_{BCSFB} * Q_{TFV}) * sasQ_{CSF} - (AF_{LV,ef} * CL_{tBCSFB} * PHF_{MV} + CLp_{BCSFB}) * Q_{TFV} * Kp_{uu,LV} * (sasQ_{CSF} + cisQ_{CSF,U}) + cisQ_{CSF,D} * ((Q_{TFV} + CLp_{BCSFB}) * Q_{ECF} * Kp_{uu,ECF} + CLp_{BCSFB} * Q_{TFV})) * venQ_{CSF,D}}{(Q_{ECF} * Kp_{uu,ECF} - cisQ_{CSF,D} * Kp_{uu,CM} + Q_{TFV}) * sasQ_{CSF} + Q_{ECF} * cisQ_{CSF,D} * Kp_{uu,ECF} + Q_{TFV} * cisQ_{CSF,U} * Kp_{uu,ECF} * CL_{tBCSFB} * PHF_{MV} * venQ_{CSF,D}}$$

$$AF_{TFV,ef} = - \frac{Q_{TFV} * Kp_{uu,CM} * venQ_{CSF,D} * ((sasQ_{CSF} + cisQ_{CSF,U}) * venQ_{CSF,U} + (cisQ_{CSF,D} + CLp_{BCSFBT}) * sasQ_{CSF} + CLp_{BCSFBT} * cisQ_{CSF,D})) - (sasQ_{CSF} + cisQ_{CSF,U}) * Q_{TFV} * Kp_{uu,LV} * venQ_{CSF,U} + ((Q_{TFV} * cisQ_{CSF,D} * Kp_{uu,CM} + (AF_{TFV,ef} * CL_{tBCSFBT}) * PHF_{MV} + CLp_{BCSFBT}) * (cisQ_{CSF,D} * Kp_{uu,CM} - Q_{ECF} * Kp_{uu,ECF} - Q_{TFV})) * sasQ_{CSF} - (AF_{TFV,in} * CL_{tBCSFBT}) * PHF_{MV} + CLp_{BCSFBT} * cisQ_{CSF,U} * (Q_{ECF} * Kp_{uu,ECF} + Q_{TFV})) * venQ_{CSF,D} + CLp_{BCSFBT} * Q_{TFV} * cisQ_{CSF,D} * Kp_{uu,CM} * sasQ_{CSF}}{(sasQ_{CSF} + cisQ_{CSF,U}) * venQ_{CSF,U} + cisQ_{CSF,D} * sasQ_{CSF} * CL_{tBCSFBT} * PHF_{MV} * Q_{TFV} * Kp_{uu,CM}}$$

$$AF_{TFV,in} = \frac{Q_{TFV} * Kp_{uu,CM} * venQ_{CSF,D} * ((sasQ_{CSF} + cisQ_{CSF,U}) * venQ_{CSF,U} + cisQ_{CSF,D} * sasQ_{CSF}) + (AF_{TFV,ef} * CL_{tBCSFBT}) * PHF_{MV} + CLp_{BCSFBT} * (sasQ_{CSF} + cisQ_{CSF,U})) - (sasQ_{CSF} + cisQ_{CSF,U}) * Q_{TFV} * Kp_{uu,LV} * venQ_{CSF,U} + Q_{TFV} * cisQ_{CSF,D} * Kp_{uu,CM} * sasQ_{CSF} + venQ_{CSF,D} * ((Q_{ECF} * Kp_{uu,ECF} - cisQ_{CSF,D} * Kp_{uu,CM} + Q_{TFV}) * sasQ_{CSF} + Q_{ECF} * cisQ_{CSF,D} * Kp_{uu,ECF} + Q_{TFV} * cisQ_{CSF,U} * Kp_{uu,ECF} * CLp_{BCSFBT} * venQ_{CSF,D} + (AF_{TFV,ef} * CL_{tBCSFBT}) * PHF_{MV} + CLp_{BCSFBT}) * Q_{TFV} * cisQ_{CSF,D} * Kp_{uu,CM} * sasQ_{CSF}}{venQ_{CSF,D} * CL_{tBCSFBT} * PHF_{MV} * (sasQ_{CSF} * (Q_{ECF} * Kp_{uu,ECF} - cisQ_{CSF,D} * Kp_{uu,CM} + Q_{TFV}) + Q_{ECF} * cisQ_{CSF,D} * Kp_{uu,ECF} + Q_{TFV} * cisQ_{CSF,U} * Kp_{uu,ECF} * CLp_{BCSFBT} * venQ_{CSF,D}))}$$

## Supplementary equations notations

AF<sub>BBB,ef</sub>: efflux asymmetry factor across the BBB; AF<sub>BBB,in</sub>: influx asymmetry factor across the BBB; AF<sub>LV,ef</sub>: efflux asymmetry factor across the BCSFB at LV; AF<sub>LV,in</sub>: influx asymmetry factor across the BCSFB at LV; AF<sub>TFV,ef</sub>: efflux asymmetry factor across the BCSFB at TFV; AF<sub>TFV,in</sub>: influx asymmetry factor across the BCSFB at TFV; BBB: blood–brain barrier; BCSFB: blood–CSF barrier; cisQ<sub>CSF,D</sub>: downward cisternal CSF movement rate; cisQ<sub>CSF,U</sub>: upward cisternal CSF movement rate; CL<sub>pBBB</sub>: paracellular transport clearance across the BBB; CL<sub>pBCSFB</sub>: paracellular transport clearance across the BCSFB at LV; CL<sub>pBCSFBT</sub>: paracellular transport clearance across the BCSFB at TFV; CL<sub>tBBB</sub>: transcellular transport clearance across the BBB; CL<sub>tBCSFB</sub>: transcellular transport clearance across the BCSFB at LV; CL<sub>tBCSFBT</sub>: transcellular transport clearance across the BCSFB at TFV; CM: cisterna magna; CSF: cerebrospinal fluid; K<sub>p<sub>uu,CM</sub></sub>: CM-to-plasma unbound drug concentration ratio at steady state; K<sub>p<sub>uu,ECF</sub></sub>: brain extracellular fluid-to-plasma unbound drug concentration ratio at steady state; K<sub>p<sub>uu,LV</sub></sub>: LV-to-plasma unbound drug concentration ratio at steady state; LV: lateral ventricles; PHF<sub>ECF</sub>: pH factor of brain extracellular fluid; PHF<sub>LV</sub>: pH factor of LV; PHF<sub>MV</sub>: pH factor of brain microvessel; PHF<sub>TFV</sub>: pH factor of TFV; Q<sub>CBF</sub>: cerebral blood flow rate; Q<sub>CPBF</sub>: choroid plexus blood flow rate; Q<sub>ECF</sub>: brain extracellular fluid bulk flow rate; sasQ<sub>CSF</sub>: clearance from subarachnoid space to plasma; TFV: third and fourth ventricles; venQ<sub>CSF,D</sub>: downward ventricular CSF movement rate; venQ<sub>CSF,U</sub>: upward ventricular CSF movement rate.

**Table S1.** Unbound plasma PK parameters used as input to the LeiCNS-PK models.

| Molecule               | Plasma PK parameter estimates |                                    |                                    |                          |                           |                           | Interindividual variability |                               |                         |                          | Residual unexplained variability |                     | Reference |
|------------------------|-------------------------------|------------------------------------|------------------------------------|--------------------------|---------------------------|---------------------------|-----------------------------|-------------------------------|-------------------------|--------------------------|----------------------------------|---------------------|-----------|
|                        | CL <sub>cen</sub><br>(mL/min) | CL <sub>cen-per1</sub><br>(mL/min) | CL <sub>cen-per2</sub><br>(mL/min) | V <sub>cen</sub><br>(mL) | V <sub>per1</sub><br>(mL) | V <sub>per2</sub><br>(mL) | CL <sub>cen</sub><br>(%)    | CL <sub>cen-per1</sub><br>(%) | V <sub>cen</sub><br>(%) | V <sub>per2</sub><br>(%) | Proportional<br>(%)              | Additive<br>(ng/mL) |           |
| Sucrose                | 0.00387                       | -                                  | -                                  | 9.2                      | -                         | -                         | -                           | -                             | -                       | -                        | 6.52                             | -                   | [19]      |
| Inulin                 | 0.00463                       | -                                  | -                                  | 9.6                      | -                         | -                         | -                           | -                             | -                       | -                        | 5.79                             | -                   | [19]      |
| Morphine-6-glucuronide | 8.05                          | 5.96                               | 0.12                               | 70.6                     | 70.0                      | 21.2                      | -                           | -                             | -                       | -                        | -                                | -                   | [68]      |
| Morphine               | 23.3                          | 4.97                               | 31.7                               | 176                      | 1640                      | 476                       | 46.9                        | 93.9                          | 92.5                    | 49.2                     | 24.2                             | -                   | [6]       |
| Atenolol               | 6.30                          | 4.25                               | -                                  | 119                      | 203                       | -                         | 8.92                        | -                             | -                       | -                        | 14.7                             | -                   | [6]       |
| Acetaminophen          | 12.1                          | 7.40                               | 6.67                               | 304                      | 466                       | 50.5                      | -                           | -                             | -                       | -                        | -                                | 0.680               | [21]      |
|                        | 0.075                         | 11.6                               | -                                  | 218                      | 4070                      | -                         | -                           | -                             | -                       | -                        | 5.08                             | -                   | [21]      |
|                        | 14.0                          | 3.26                               | -                                  | 225                      | 86.3                      | -                         | 8.14                        | -                             | 6.68                    | -                        | 7.67                             | 3.80                | [22]      |
| Antipyrine             | 2.59                          | -                                  | -                                  | 237                      | -                         | -                         | -                           | -                             | -                       | -                        | -                                | 102                 | [21]      |
| Cefodizime             | 1.49                          | 4.85                               | 15.1                               | 137                      | 151                       | 53.4                      | -                           | -                             | -                       | -                        | 0.93                             | -                   | [23]      |
| Guanidinosuccinic acid | 1.02                          | 2.29                               | -                                  | 34.3                     | 26.0                      | -                         | -                           | -                             | -                       | -                        | -                                | 0.568               | [24]      |
| Ziconotide             | 0.0845                        | 0.461                              | -                                  | 28.2                     | 29.0                      | -                         | -                           | -                             | -                       | -                        | 3.42                             | -                   | [25]      |

CL<sub>cen</sub>: clearance from the central compartment; CL<sub>cen-per1/2</sub>: distribution clearance between the central and peripheral compartments; V<sub>cen</sub>: central distribution volume; V<sub>per1/2</sub>: peripheral distribution volume.

**Table S2.** Drug-specific physicochemical parameters, unbound fraction in plasma and  $K_{p_{uu}}$  values.

| Molecule               | Molecular weight | Charge class | pK <sub>a</sub> | pK <sub>b</sub> | logP <sub>o/w</sub> | f <sub>up</sub>         | K <sub>p<sub>uu</sub></sub> after IV administration |                    |                        |
|------------------------|------------------|--------------|-----------------|-----------------|---------------------|-------------------------|-----------------------------------------------------|--------------------|------------------------|
|                        |                  |              |                 |                 |                     |                         | Brain ECF                                           | CSF <sub>LV</sub>  | CSF <sub>CM</sub>      |
| Sucrose                | 342.3            | Neutral      | 11.84           | -3              | -3.7                | 1 <sup>[34]</sup>       | No active transport <sup>[34]</sup>                 |                    |                        |
| Inulin                 | 6179.4           | Neutral      | 11.27           | -4              | -62 <sup>a</sup>    | 1 <sup>b</sup>          | No active transport                                 |                    |                        |
| Morphine-6-glucuronide | 285.3            | Base         | 10.26           | 9.12            | 0.87                | 0.83 <sup>[6]</sup>     | 0.37 <sup>[6,69]</sup>                              | 0.20 <sup>c</sup>  | 0.20 <sup>[69]</sup>   |
| Morphine               | 461.5            | Zwitterion   | 2.87            | 9.12            | 0.13 <sup>d</sup>   | 0.84 <sup>[68-70]</sup> | 0.36 <sup>[68-70]</sup>                             | 0.029 <sup>c</sup> | 0.029 <sup>[69]</sup>  |
| Atenolol               | 266.34           | Base         | 14.08           | 9.67            | 0.16                | 0.91 <sup>[6]</sup>     | 0.042 <sup>[22]</sup>                               | 0.51 <sup>c</sup>  | 0.51 <sup>[21]</sup>   |
| Acetaminophen          | 151.16           | Neutral      | 9.46            | -4.4            | 0.91                | 0.81 <sup>[6]</sup>     | 0.22 <sup>[22]</sup>                                | 1.05 <sup>c</sup>  | 1.05 <sup>[21]</sup>   |
| Antipyrine             | 188.23           | Neutral      | NA              | 0.49            | 0.38                | 1 <sup>[71]</sup>       | 0.71 <sup>[4]</sup>                                 | 1.51 <sup>c</sup>  | 1.51 <sup>[21]</sup>   |
| Cefodizime             | 584.67           | Acid         | 2.68            | 3.45            | 1.07 <sup>d</sup>   | 0.14 <sup>[23]</sup>    | 0.19 <sup>[23]</sup>                                | 0.027 <sup>c</sup> | 0.027 <sup>[23]</sup>  |
| Guanidinosuccinic acid | 175.14           | Zwitterion   | 2.98            | 12.2            | -2.07               | 1 <sup>[72,73]</sup>    | 0.25 <sup>c</sup>                                   | 0.25 <sup>c</sup>  | 0.25 <sup>[74],e</sup> |
| Ziconotide             | 2639.1           | Base         | 3.41            | 12.18           | -23 <sup>a</sup>    | 0.44 <sup>[75]</sup>    | 0.018 <sup>c</sup>                                  | 0.018 <sup>c</sup> | 0.018 <sup>[25]</sup>  |

CM: cisterna magna; CSF: cerebrospinal fluid; ECF: extracellular fluid; f<sub>up</sub>: fraction unbound in plasma; IV: intravenous; K<sub>p<sub>uu</sub></sub>: the ratio of the unbound drug concentration in the compartment of interest to that in plasma at steady state; LV: lateral ventricle; NA: not applicable; pK<sub>a</sub>: the ionization constant of the strongest acidic group; pK<sub>b</sub>: the ionization constant of the strongest basic group.

<sup>a</sup> Calculated by ChemAxon [33]; <sup>b</sup> obtained from DrugBank [31]; <sup>c</sup> the same value as CSF<sub>CM</sub> was assumed; <sup>d</sup> calculated by ALOGP [76]; <sup>e</sup> a mean value in human at lumbar CSF was used.

**Table S3.** Assumed volumes of dosing solution reached each compartment at the end of administration.

| Molecule                  | Reference | Dosing site          | Dosing volume (μL) | Assumed volume of dosing solution reached in each compartment at the end of administration (μL) |          |      |      |     |
|---------------------------|-----------|----------------------|--------------------|-------------------------------------------------------------------------------------------------|----------|------|------|-----|
|                           |           |                      |                    | Left LV                                                                                         | Right LV | TFV  | CM   | SAS |
| [ <sup>3</sup> H]sucrose  | [18]      | Left LV              | 12.5 <sup>a</sup>  | 3.75                                                                                            | 0        | 7.5  | 1.25 | 0   |
| [ <sup>14</sup> C]sucrose | [19]      | CM                   | 100 <sup>b</sup>   | 0                                                                                               | 0        | 0    | 17   | 83  |
| Inulin                    | [22]      | Right LV             | 12.5 <sup>c</sup>  | 0                                                                                               | 3.75     | 7.5  | 1.25 | 0   |
| [ <sup>14</sup> C]inulin  | [19]      | CM                   | 100 <sup>b</sup>   | 0                                                                                               | 0        | 0    | 17   | 83  |
| Morphine-6-glucuronide    | [18]      | Left LV              | 12.5 <sup>a</sup>  | 3.75                                                                                            | 0        | 7.5  | 1.25 | 0   |
| Morphine                  | [18]      | Left LV              | 12.5 <sup>a</sup>  | 3.75                                                                                            | 0        | 7.5  | 1.25 | 0   |
| Atenolol                  | [21]      | Left LV <sup>d</sup> | 10                 | 3.75                                                                                            | 0        | 6.25 | 0    | 0   |
|                           | [22]      | Left LV              | 15                 | 3.75                                                                                            | 0        | 7.5  | 3.75 | 0   |
| Acetaminophen             | [21]      | Left LV <sup>d</sup> | 10                 | 3.75                                                                                            | 0        | 6.25 | 0    | 0   |
|                           | [22]      | Left LV              | 10                 | 3.75                                                                                            | 0        | 6.25 | 0    | 0   |
| Antipyrine                | [21]      | Left LV <sup>d</sup> | 10                 | 3.75                                                                                            | 0        | 6.25 | 0    | 0   |
| Cefodizime                | [23]      | Left LV <sup>d</sup> | 10                 | 3.75                                                                                            | 0        | 6.25 | 0    | 0   |
| Guanidinosuccinic acid    | [24]      | Left LV              | 10                 | 3.75                                                                                            | 0        | 6.25 | 0    | 0   |
| Ziconotide                | [25]      | SAS                  | 100                | 0                                                                                               | 0        | 0    | 0    | 100 |

CM: cisterna magna; LV: lateral ventricle; SAS: subarachnoid space; TFV: third and fourth ventricles.

<sup>a</sup> Assumed as the middle of other ICV cases (10-15 μL); <sup>b</sup> the same volume of CSF was withdrawn before administration; <sup>c</sup> 50 μL/kg in the literature; <sup>d</sup> assumed because the site of administration was “lateral ventricle” in the literature.

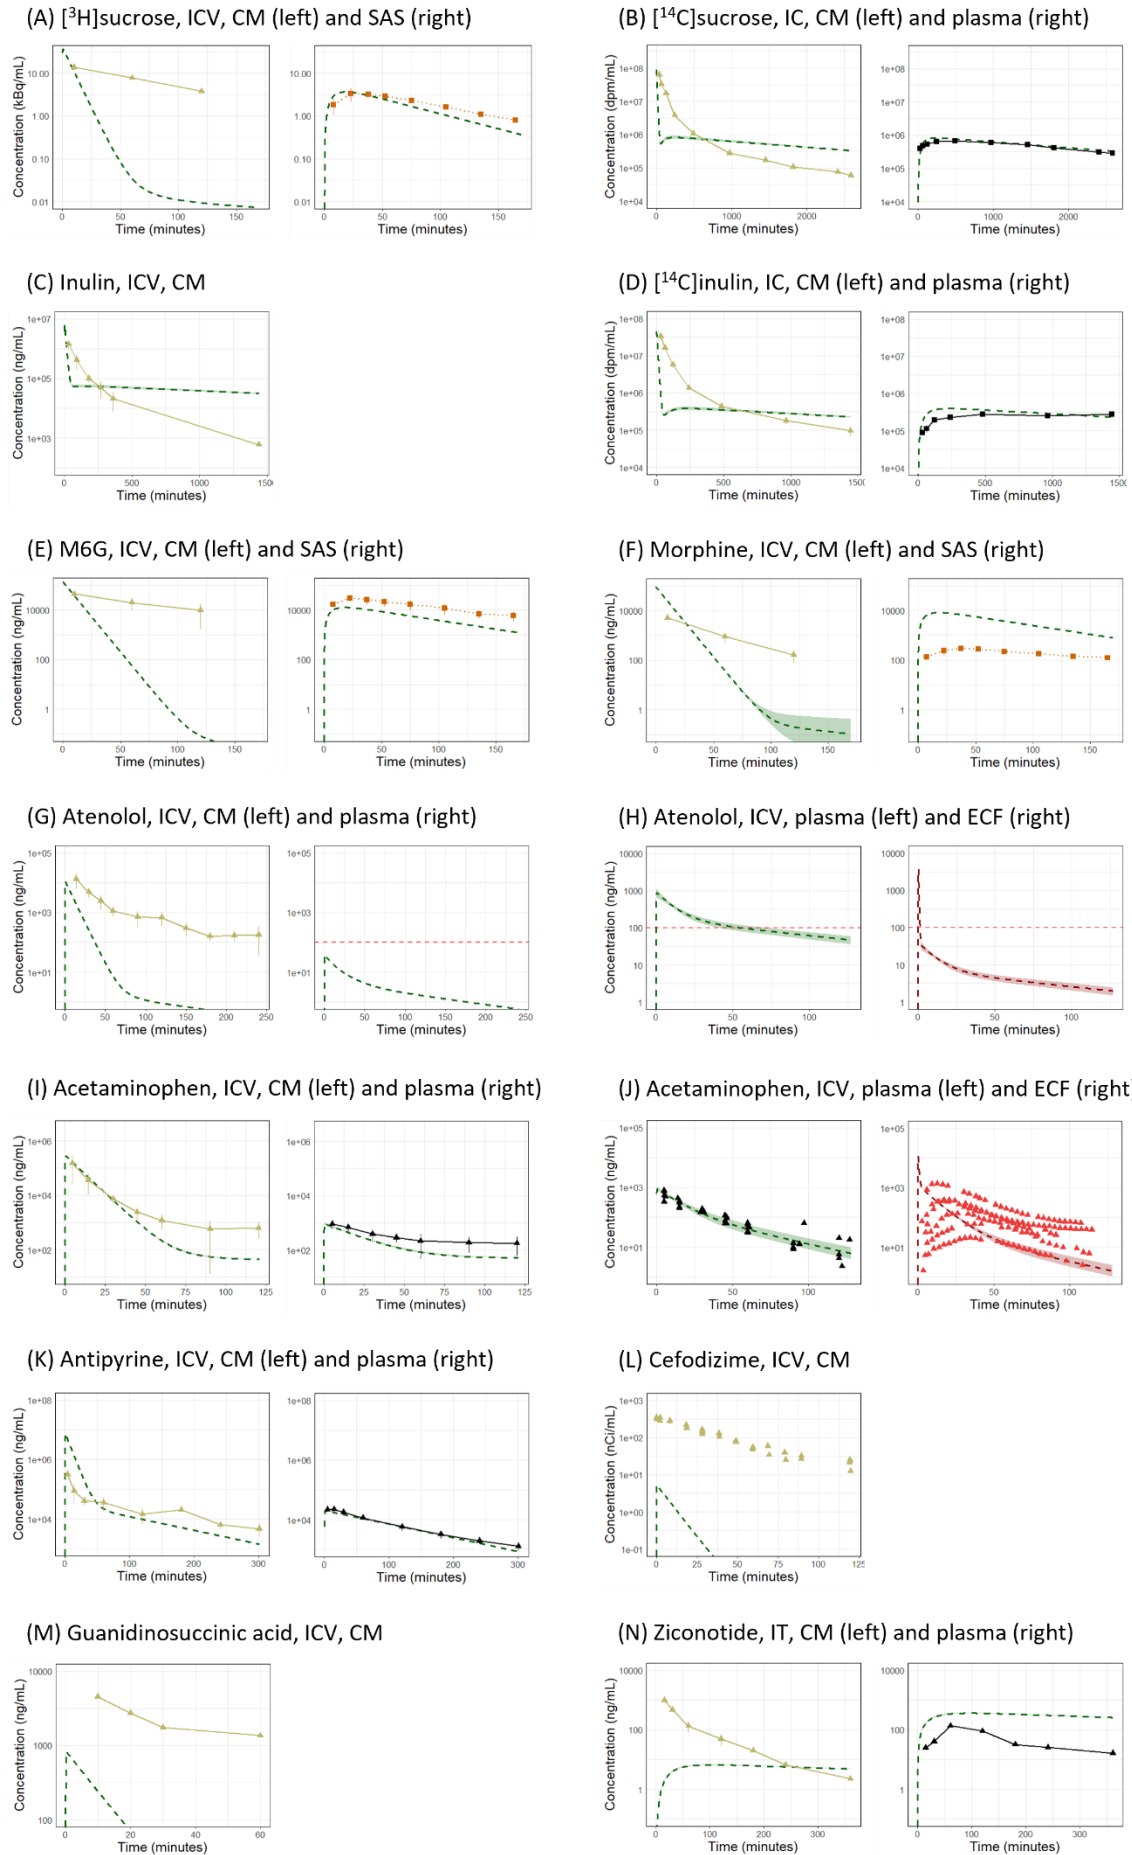

**Figure S1.** Comparison of simulated PK profiles of 10 molecules using the original LeiCNS-PK3.0 model with the default settings to the observed ones after intra-CSF administration. Dots and solid lines represent mean concentrations  $\pm$  standard deviation or standard error in CM (khaki), SAS (orange), plasma (black) and ECF (red). Dashed lines represent the median of 200 model simulations with 95% prediction intervals (colored band). Red horizontal dashed lines in (G)

and (H) represent the lower limit of quantification of atenolol. (A) [<sup>3</sup>H]sucrose after ICV administration, (B) [<sup>14</sup>C]sucrose after IC administration, (C) inulin after ICV administration, (D) [<sup>14</sup>C]inulin after IC administration, (E) morphine-6-glucuronide after ICV administration, (F) morphine after ICV administration, (G)(H) atenolol after ICV administration, (I)(J) acetaminophen after ICV administration, (K) antipyrine after ICV administration, (L) cefodizime after ICV administration, (M) guanidinosuccinic acid after ICV administration and (N) ziconotide after IT administration. CM: cisterna magna; ECF: brain extracellular fluid; ICV: intracerebroventricular; IT: intrathecal; M6G: morphine-6-glucuronide; SAS: subarachnoid space.

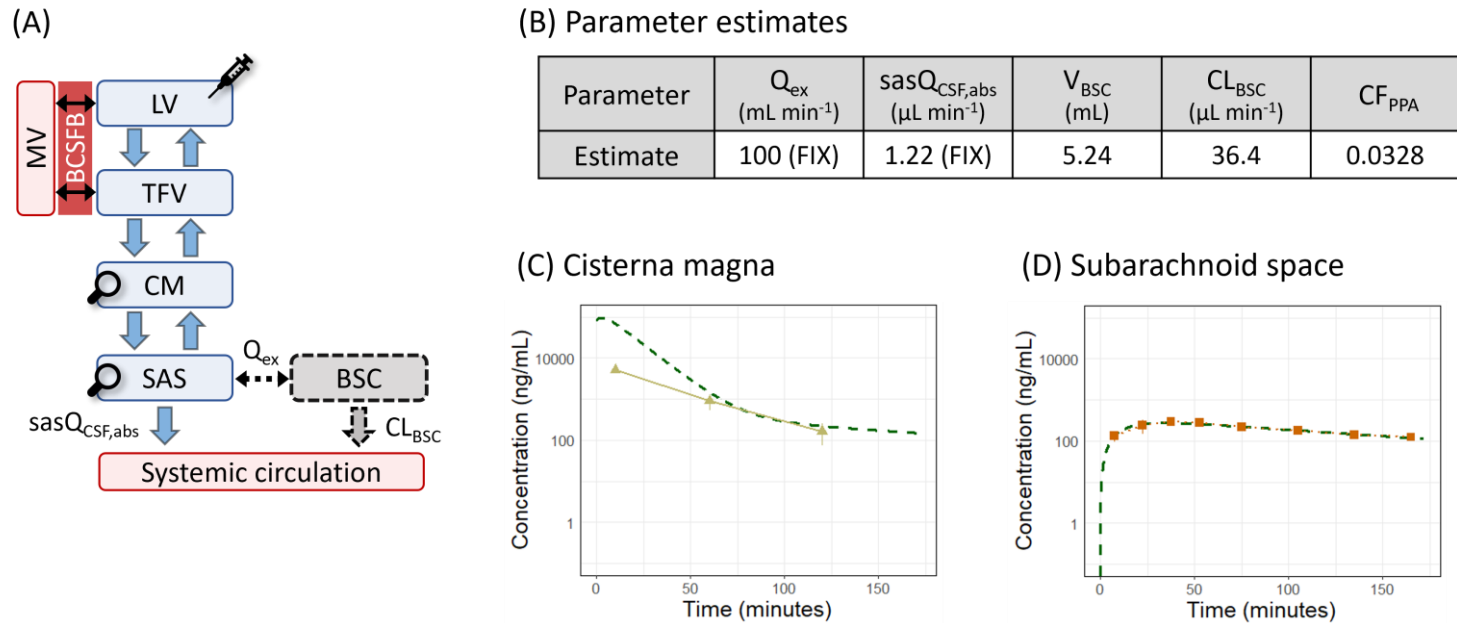

**Figure S2.** PK profiles of morphine after ICV administration simulated with the LeiCNS-PK3.1 model plus brain–spinal cord surface compartment. (A) Model structure, (B) parameters estimated by model fitting, (C) simulated vs. observed PK profiles in cisterna magna and (D) subarachnoid space. A black syringe icon and two magnifying glass icons in (A) represent the site of administration and measurement, respectively. BCSFB: blood–cerebrospinal fluid barrier; BSC: brain–spinal cord surface compartment;  $CF_{PPA}$ : correction factor for paracellular permeability;  $CL_{BSC}$ : clearance from BSC to the systemic circulation; CM: cisterna magna; LV: lateral ventricles; MV: brain microvessel;  $Q_{ex}$ : exchange clearance between SAS and BSC, fixed to 100 mL/min assuming fast exchange due to the proximity; SAS: subarachnoid space;  $sasQ_{CSF,abs}$ : drug-independent transfer clearance from SAS to the systemic circulation by passive CSF absorption; TFV: third and fourth ventricles;  $V_{BSC}$ : distribution volume of BSC.



(A)

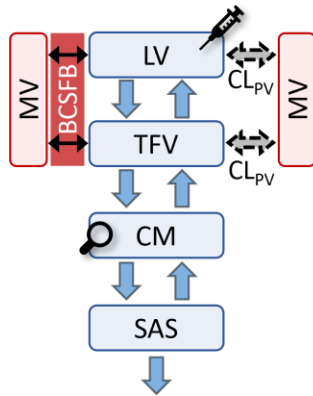

(B) Parameter estimates<sup>a)</sup>

| Parameter     | $\text{sasQ}_{\text{CSF}}$<br>( $\mu\text{L min}^{-1}$ ) | $\text{CL}_{\text{PV}}$<br>( $\mu\text{L min}^{-1}$ ) |
|---------------|----------------------------------------------------------|-------------------------------------------------------|
| Acetaminophen | 5.17                                                     | 21.7                                                  |
| Antipyrine    | 0.632                                                    | 148                                                   |

<sup>a)</sup>  $\text{CF}_{\text{PPA}}$  was set to 1 for parameter estimation

(C) Acetaminophen, ICV, CM (left) and plasma (right)

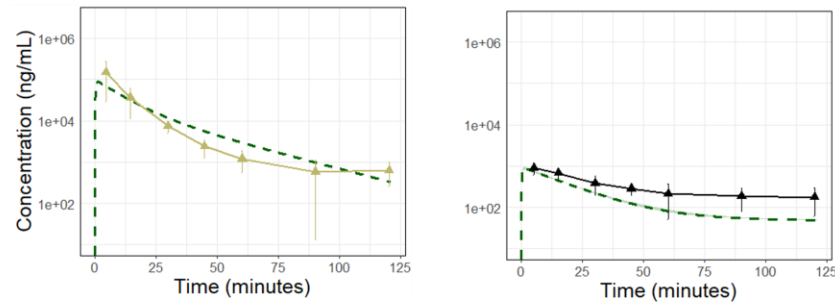

(D) Antipyrine, ICV, CM (left) and plasma (right)

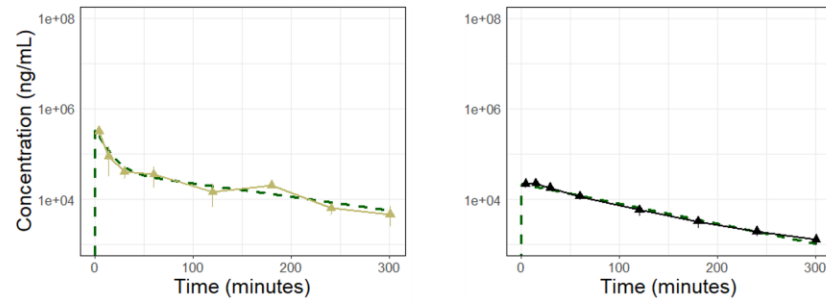

**Figure S3.** PK profiles of acetaminophen and antipyrine after ICV administration simulated with the LeiCNS-PK3.1 model plus periventricular clearance. (A) Model structure, (B) parameters estimated by model fitting, (C) simulated vs. observed PK profiles of acetaminophen and (D) antipyrine in cisterna magna and plasma. A black syringe icon and a magnifying glass icon in (A) represent the site of administration and measurement, respectively. BCSFB: blood–cerebrospinal fluid barrier;  $\text{CF}_{\text{PPA}}$ : correction factor for paracellular permeability;  $\text{CL}_{\text{PV}}$ : periventricular clearance; CM: cisterna magna; LV: lateral ventricles; MV: brain microvessel; SAS: subarachnoid space; TFV: third and fourth ventricles.
